# Supplementary material for: Ferromagnetic interactions through double hydrogen bonding bridges in manganese(ii) coordination polymers
Source: Royal Society of Chemistry journal article supplement (doi:10.1039/c2dt32826g), 2012-12-17
Supplement: c2dt32826g.pdf [file c2dt32826g.pdf]

## **Electronic Supplementary Information (ESI)**

### **Ferromagnetic interaction through double hydrogen bonding bridges in manganese(II) coordination polymers**

Kun Wang,<sup>a</sup> Yan-Qin Wang<sup>a</sup>, Xiu-Mei Zhang<sup>a</sup> and En-Qing Gao<sup>\*a</sup>

Shanghai Key Laboratory of Green Chemistry and Chemical Processes, Department of Chemistry, East  
China Normal University, Shanghai 200062, P.R.China; E-mail: eqgao@chem.ecnu.edu.cn.

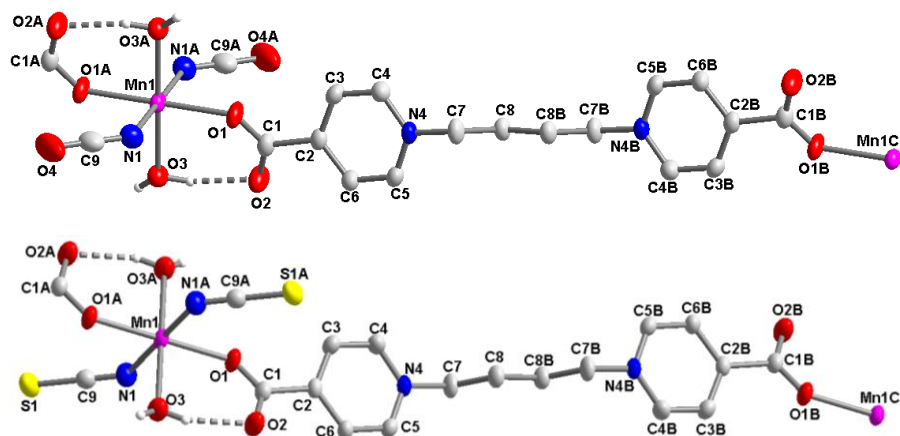

**Figure S1.** Local coordination environments of the Mn(II) centre in compound **2** and **3**. Symmetry codes: A =  $1-x, -y, 1-z$ , B =  $3-x, 1-y, -1-z$ , C =  $2+x, 1+y, z-2$  for **2**; A =  $1-x, 1-y, 1-z$ , B =  $1-x, -y, 3-z$ , C =  $x, y-1, z+2$  for **3**.

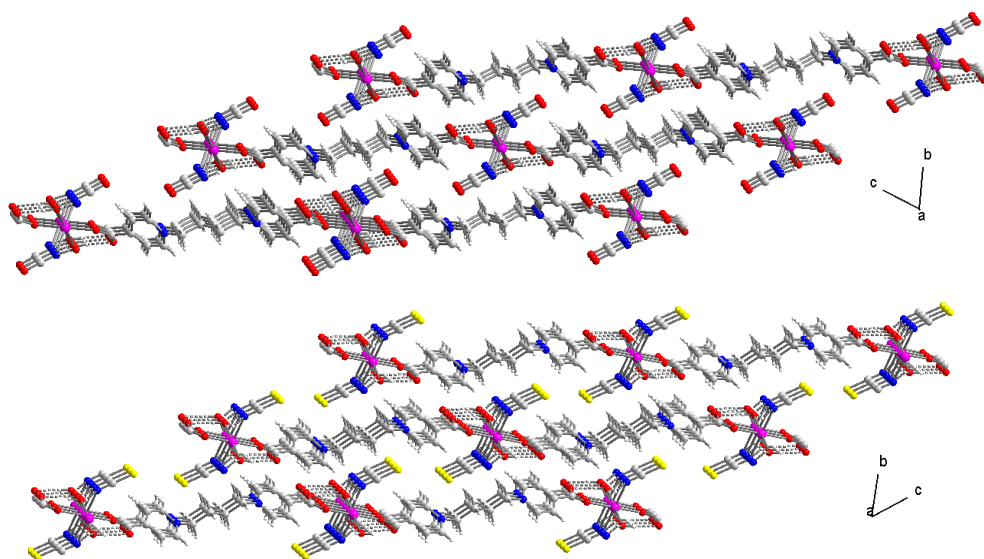

**Figure S2.** The offset packing of the layers for **2** and **3**.

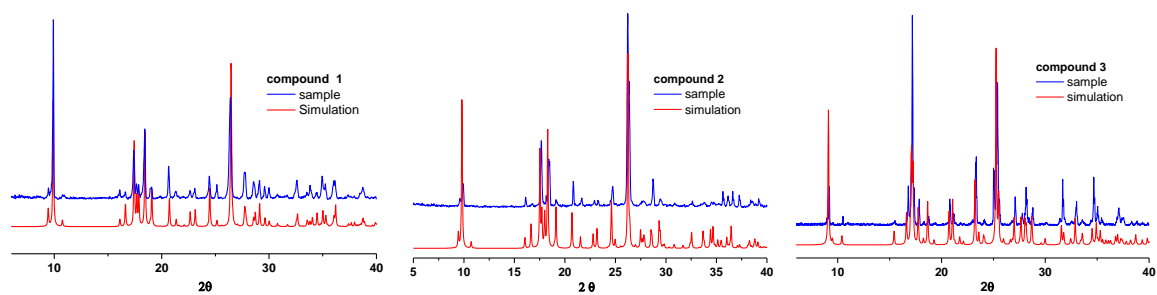

**Figure S3.** Powder X-ray diffraction data for compound 1-3.

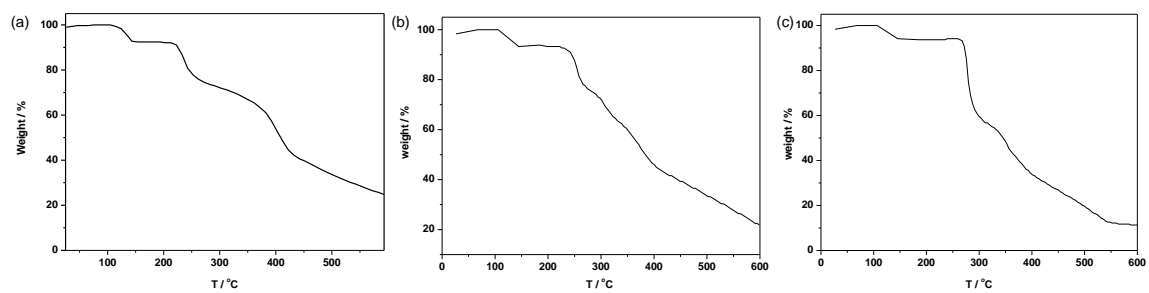

**Figure S4.** The curves of Thermogravimetric analyses for 1-3.
